# Supplementary material
Source: publisher figshare collection journal article supplement (https://acs.figshare.com/ndownloader/files/12742445)
Supplement: Supplementary file 1 [file 12742445]

# Supporting Information

## Spray-Pyrolyzed ZnO as Electron Selective Contact for Long Term Stable Planar $\text{CH}_3\text{NH}_3\text{PbI}_3$ Perovskite Solar Cells.

Thi Tuyen Ngo<sup>1</sup>, Eva M. Barea<sup>1</sup>, Ramon Tena-Zaera<sup>2</sup> and Iván Mora-Seró<sup>1,\*</sup>

<sup>1</sup> Institute of Advanced Materials (INAM), University Jaume I, Avenida de Vicent Sos Baynat, s/n, 12006 Castelló de la Plana, Castellón (Spain)

<sup>2</sup>CIDETEC, Parque Tecnológico de San Sebastián, Paseo Miramón, 196, Donostia–San Sebastián 20014 (Spain)

\* Corresponding author: [sero@uji.es](mailto:sero@uji.es)

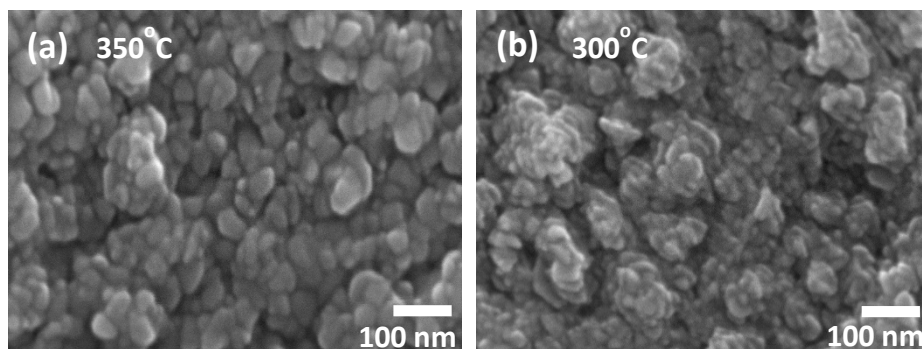

**Figure S1.** Top view SEM from secondary electrons of ZnO spray-pyrolyzed from 0.1 M zinc acetate solution at 350°C (a) and 300°C (b) with oxygen flow.

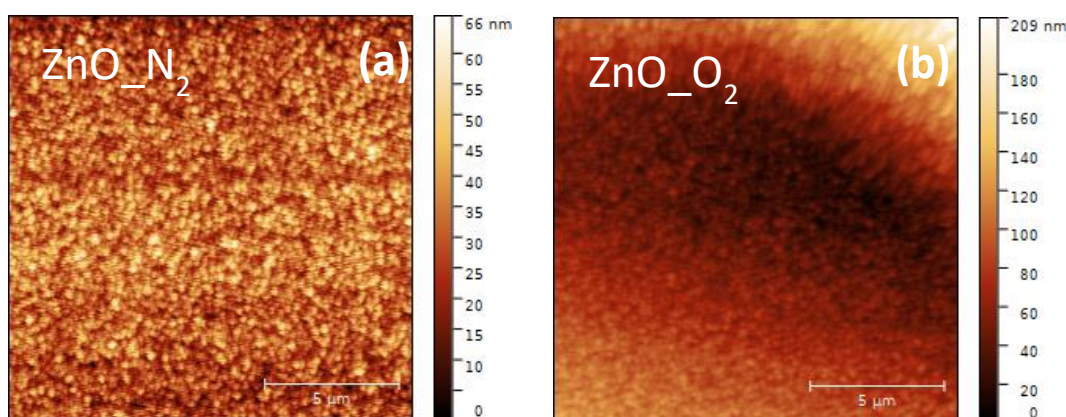

## Supporting Information

**Figure S2.** Atomic force microscopy (AFM) of ZnO layer deposited on FTO from 0.3M of zinc acetate solution at 450°C with nitrogen (a, named ZnO\_N<sub>2</sub>) and oxygen flow (b, named ZnO\_O<sub>2</sub>).

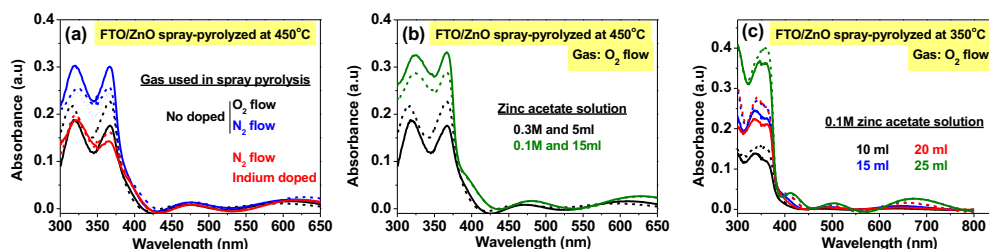

**Figure S3.** Absorbance spectra of spray-pyrolyzed ZnO from (a) 5 ml of 0.3 M zinc acetate solution at 450°C with nitrogen and oxygen flow; (b) different volume and zinc acetate concentration solution at 450°C with oxygen flow, the amount of Zn<sup>2+</sup> ions was maintained the same in the spray solutions and (c) different volume of 0.1M zinc acetate solution at 350°C with oxygen flow.

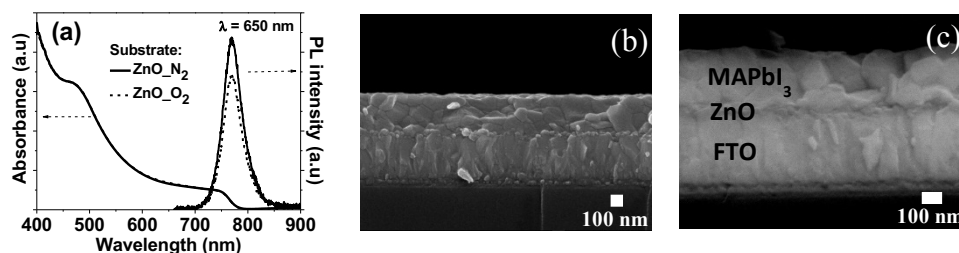

**Figure S4.** (a) Absorbance and photoluminescence (PL) of fresh MAPbI<sub>3</sub> on ZnO layer spray-pyrolyzed from 0.3 M zinc acetate solution at 450°C with nitrogen and oxygen flow. Cross section SEM images from secondary (b) and backscattered electrons (c) of fresh MAPbI<sub>3</sub> film deposited on ZnO prepared with N<sub>2</sub> flow.

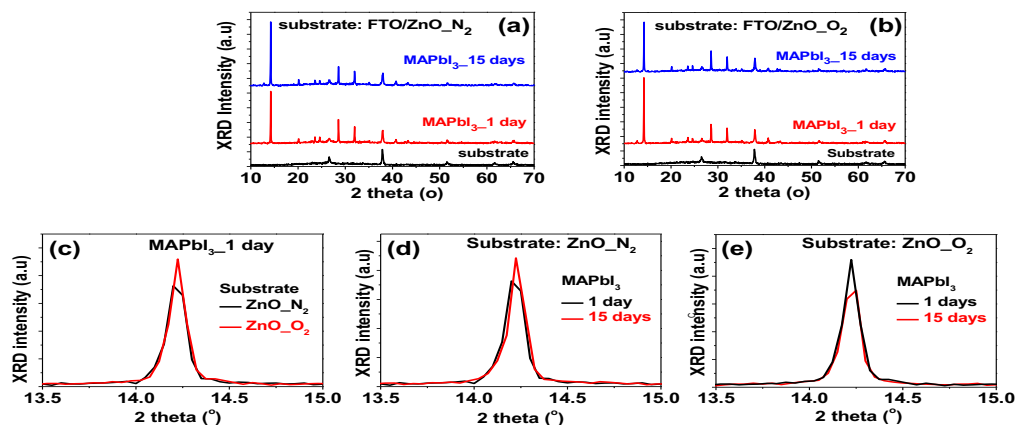

**Figure S5.** (a-b) XRD pattern of 1 day and 15 day-old MAPbI<sub>3</sub> deposited on FTO/ZnO\_N<sub>2</sub> (a) and FTO/ZnO\_O<sub>2</sub> substrates (b). In which ZnO was spray-pyrolyzed from 0.3 M zinc

## Supporting Information

acetate solution at 450°C with nitrogen and oxygen flow. The XRD pattern of substrate is belong to SnO<sub>2</sub> (reference pattern: 9163). There is no detection of ZnO peaks due to its extremely thin thickness. (c-e) Comparison of XRD intensity at 14.2° of those MAPbI<sub>3</sub> films which were stored under dark and at room temperature and at around 35% of humidity.

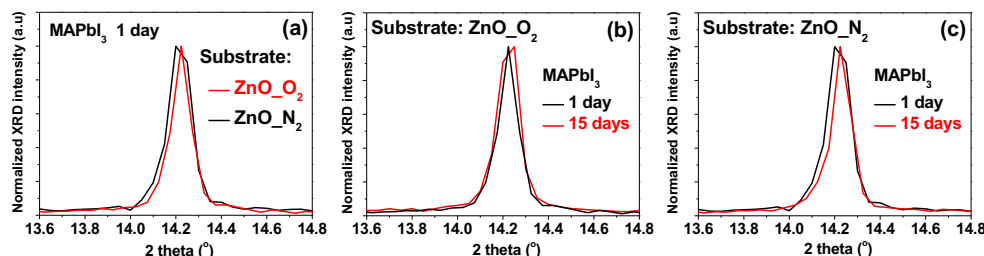

**Figure S6.** Normalized XRD intensity at 14.2° of (a) 1 day-old MAPbI<sub>3</sub> deposited on FTO/ZnO\_N<sub>2</sub> and FTO/ZnO\_O<sub>2</sub> substrates. And normalized XRD intensity at 14.2° of fresh (1 day) and old (15 days) MAPbI<sub>3</sub> film deposited on (b) FTO/ZnO\_O<sub>2</sub> and (c) FTO/ZnO\_N<sub>2</sub> substrates. In which ZnO was spray-pyrolyzed from 0.3 M zinc acetate solution at 450°C with nitrogen and oxygen flow. Those MAPbI<sub>3</sub> films which were stored under dark and at room temperature and at around 35% of humidity.

**Table S1.** Full width at half maximum (FWHM) and normalized XRD intensity of 1 day and 15 days-old MAPbI<sub>3</sub> film deposited on FTO/ZnO\_N<sub>2</sub> and FTO/ZnO\_O<sub>2</sub> compact layer. In which ZnO was spray-pyrolyzed from 0.3 M zinc acetate solution at 450°C with nitrogen and oxygen flow. MAPbI<sub>3</sub> films were stored under dark and around 35% of humidity.

| 2 theta<br>(°) | FWHM                          |                              |                               |                              |
|----------------|-------------------------------|------------------------------|-------------------------------|------------------------------|
|                | Substrate: ZnO_N <sub>2</sub> |                              | Substrate: ZnO_O <sub>2</sub> |                              |
|                | MAPbI <sub>3</sub> : 1 day    | MAPbI <sub>3</sub> : 15 days | MAPbI <sub>3</sub> : 1 day    | MAPbI <sub>3</sub> : 15 days |
| 14.2           | 0.117                         | 0.101                        | 0.104                         | 0.111                        |
| 2 theta<br>(°) | XRD intensity (%)             |                              |                               |                              |
|                | Substrate: ZnO_N <sub>2</sub> |                              | Substrate: ZnO_O <sub>2</sub> |                              |
|                | MAPbI <sub>3</sub> : 1 day    | MAPbI <sub>3</sub> : 15 days | MAPbI <sub>3</sub> : 1 day    | MAPbI <sub>3</sub> : 15 days |
| 14.2           | 100                           | 100                          | 100                           | 100                          |
| 28.6           | 47.2                          | 31.2                         | 30.4                          | 43.3                         |
| 32             | 33.7                          | 24.2                         | 24.9                          | 31.7                         |

# Supporting Information

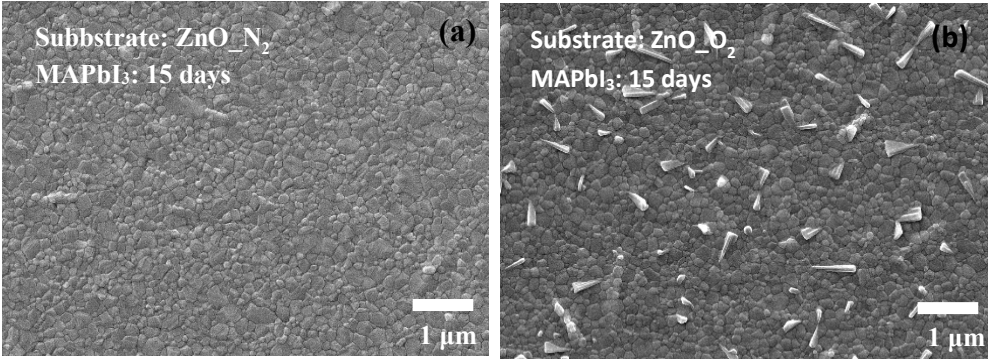

**Figure S7.** Low magnification top view SEM of 15 days-old MAPbI<sub>3</sub> deposited on FTO/ZnO\_N<sub>2</sub> (a) and FTO/ZnO\_O<sub>2</sub> substrates (b). In which ZnO was spray-pyrolyzed from of 0.3 M zinc acetate solution at 450°C with nitrogen and oxygen flow. MAPbI<sub>3</sub> films were stored under dark and at room temperature and at around 35% of humidity.

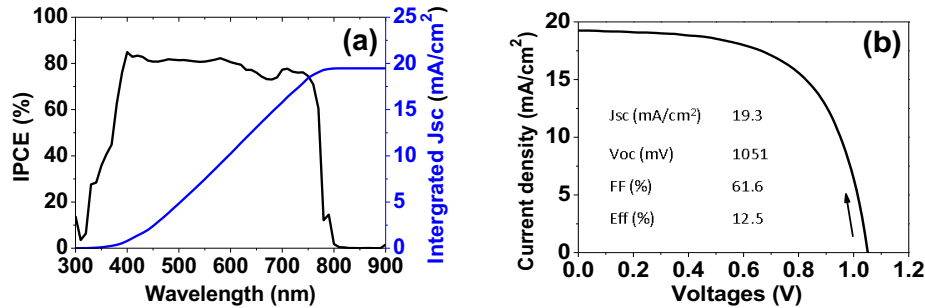

**Figure S8.** IPCE spectra and integrated short circuit current density (J<sub>sc</sub>) of FTO/ZnO\_N<sub>2</sub>/MAPbI<sub>3</sub>/Spiro OMeTAD/Au (a) and its J-V curve, reverse scan, measured at 1 sun illumination (b). In which ZnO was spray-pyrolyzed from 0.3 M zinc acetate solution at 450°C with nitrogen flow.

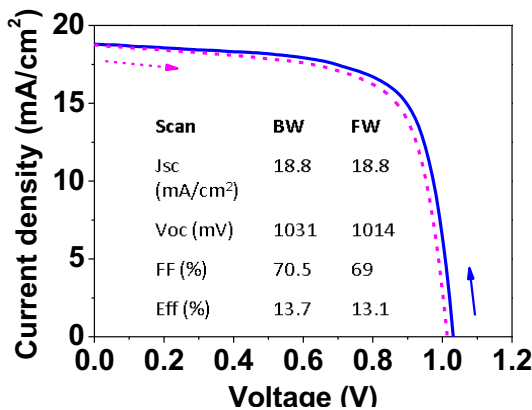

**Figure S9.** Current density-voltage (J-V) characteristic of best device after 34 days prepared with a structure of FTO/ZnO\_N<sub>2</sub>/MAPbI<sub>3</sub>/Spiro OMeTAD/Au at 1 sun illumination. In which ZnO was spray-pyrolyzed from 0.3 M zinc acetate solution at 450°C with nitrogen flow. Sample was stored under dark at room temperature and at around 35% of humidity.

## Supporting Information

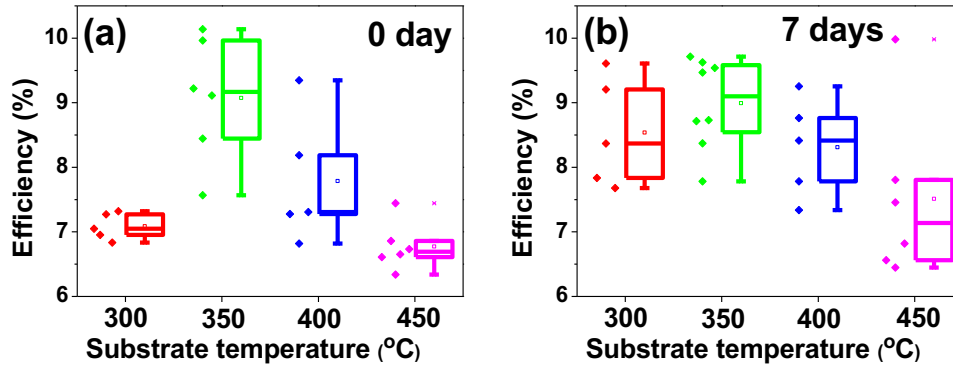

**Figure S10.** Performance at 1 sun illumination of planar based ZnO<sub>2</sub> devices with a structure of FTO/ZnO/MAPbI<sub>3</sub>/Spiro OMeTAD/Au measured immediately (a) and 7 days after the preparation (b). In which ZnO was spray-pyrolyzed from 15 ml of 0.1 M zinc acetate solution at different substrate temperatures with oxygen flow. Full devices were stored under dark, at room temperature and at around 35% of humidity. The concentration of zinc acetate solution was reduced 1/3 times however the solution volume was increased 3 times to maintain the same amount of Zn<sup>2+</sup>, in comparison with the samples used in Table 1. The best efficiency for fresh devices was archived for ZnO prepared at 350°C and this value is similar to that obtained for ZnO spray-pyrolyzed at 450°C with higher concentration of zinc acetate solution (table 1 and table S2). The reason is at different solution concentrations and different substrate temperatures, ZnO was formed differently.

**Table S2.** Statistic photovoltaic parameters at 1 sun of planar based ZnO thin film devices showed in the Figure S10.

| Time [days] | Subs. temp [°C] | Jsc [mA/cm <sup>2</sup> ] | Voc [mV]     | FF [%]     | Eff [%]   |
|-------------|-----------------|---------------------------|--------------|------------|-----------|
| 0           | 300             | 15.5 ± 0.1                | 934.2 ± 16.7 | 46.4 ± 0.7 | 7.1 ± 0.1 |
| 7           |                 | 16.1 ± 0.1                | 1006.2 ± 8.9 | 53.5 ± 1   | 8.5 ± 0.3 |
| 0           | 350             | 15.9 ± 0.1                | 1010.4 ± 9.4 | 50.2 ± 1.6 | 9.1 ± 0.3 |
| 7           |                 | 15.6 ± 0.2                | 1021.5 ± 6.9 | 57.8 ± 0.9 | 9 ± 0.2   |
| 0           | 400             | 16.9 ± 0.2                | 831.6 ± 21.8 | 52 ± 0.4   | 7.8 ± 0.4 |
| 7           |                 | 14.9 ± 0.1                | 981 ± 18.7   | 55.2 ± 0.5 | 8.3 ± 0.3 |
| 0           | 450             | 16.1 ± 0.2                | 773.4 ± 16.1 | 49.1 ± 1.2 | 6.8 ± 0.1 |
| 7           |                 | 13.8 ± 0.3                | 933.8 ± 17   | 57.9 ± 0.8 | 7.5 ± 0.4 |

## Supporting Information

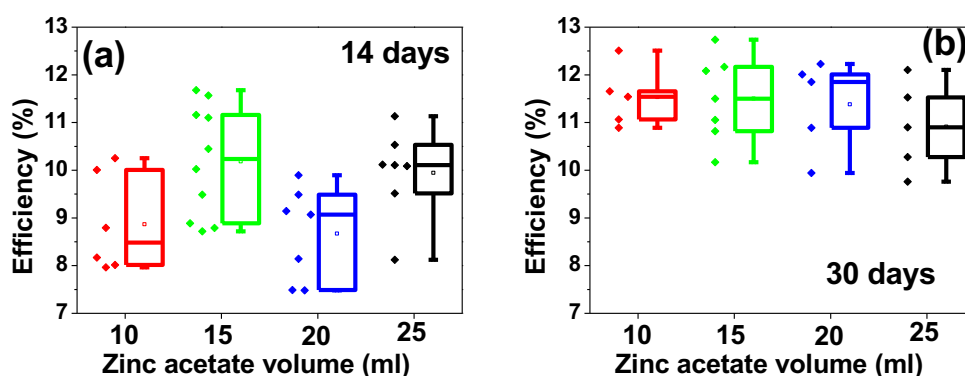

**Figure S11.** Performance at 1 sun illumination of planar based ZnO<sub>2</sub> devices with a structure of FTO/ZnO/MAPbI<sub>3</sub>/Spiro OMeTAD/Au measured 14 days (a) and 30 days (b) after the preparation. In which ZnO was spray-pyrolyzed from different volume of 0.1 M zinc acetate solution at 350°C substrate temperatures with oxygen flow. Full devices were stored under dark and at room temperature and at around 35% of humidity.

**Table S3.** Statistic photovoltaic parameters of planar based ZnO thin film devices showed in the Figure S11.

| Time [days] | Zinc acetate volume [ml] | Efficiency [%] |
|-------------|--------------------------|----------------|
| 14          | 10                       | 8.9 ± 0.3      |
| 30          |                          | 11.5 ± 0.3     |
| 14          | 15                       | 10.1 ± 0.3     |
| 30          |                          | 11.3 ± 0.2     |
| 14          | 20                       | 8.7 ± 0.3      |
| 30          |                          | 11.4 ± 0.4     |
| 14          | 25                       | 9.9 ± 0.3      |
| 30          |                          | 10.9 ± 0.4     |

**Table S4.** Photovoltaic parameters at 1 sun illumination of fresh (0 day-old) planar based ZnO devices with a structure of ZnO/MAPbI<sub>3</sub>/Spiro OMeTAD/Au. In which ZnO was spray-pyrolyzed from of 0.1 M zinc acetate solution at 300°C substrate (FTO or ITO) temperatures with oxygen flow.

| Substrates | Jsc mA/cm <sup>2</sup> | Voc mV  | FF %  | Efficiency % |
|------------|------------------------|---------|-------|--------------|
| FTO/ZnO    | 15.78                  | 1067.35 | 45.14 | 7.60         |
| ITO/ZnO    | 12.84                  | 1012.12 | 59.70 | 7.76         |



## Supporting Information

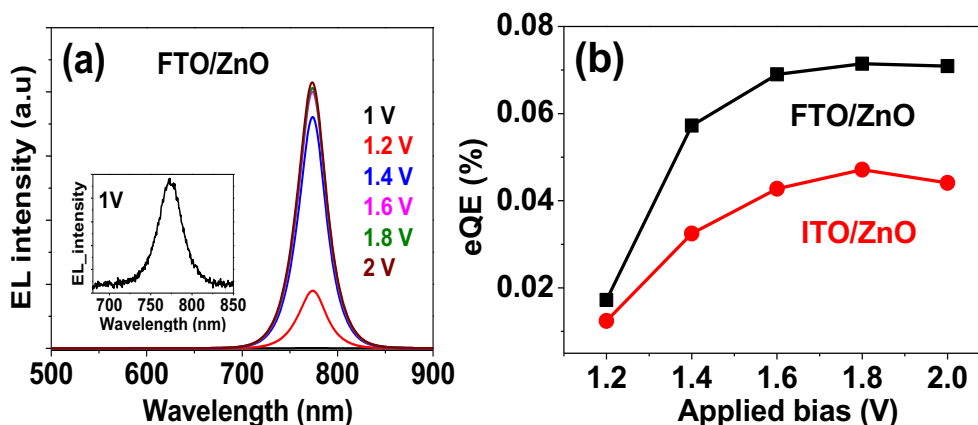

**Figure S12.** (a) EL spectra and eQE (b) of fresh (0 day-old) LED devices with a structure of ZnO/MAPbI<sub>3</sub>/Spiro OMeTAD/Au at different applied bias. In which ZnO was spray-pyrolyzed from 0.1M zinc acetate solution at 300°C substrate (FTO or ITO) temperatures with oxygen flow.

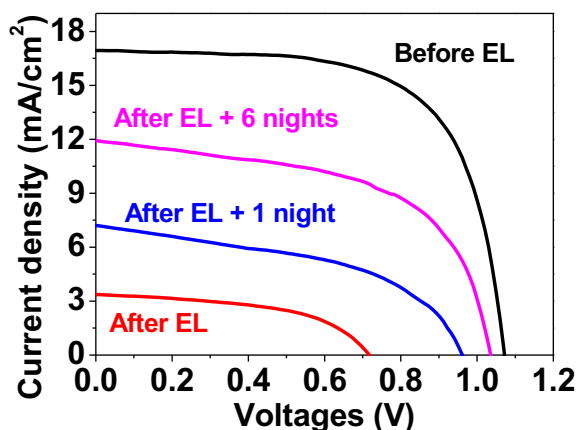

**Figure S13.** Performance at 1 sun illumination of un-encapsulated planar based ZnO devices with a structure of FTO/ZnO/MAPbI<sub>3</sub>/Spiro OMeTAD/Au before and after the EL measurement at 1.8 V applied bias. In which ZnO was spray-pyrolyzed from 0.3M zinc acetate solution at 450°C with oxygen flow. Full devices were stored under dark and at room temperature and at around 35% of humidity. It is well known that after the electroluminescence (EL) measurement un-encapsulated MAPbI<sub>3</sub> devices degraded. Our devices showed a significant drop after the characterization as LED. However the performance was recovered partially with time storing the device under dark at room temperature and with a humidity of around 35%.

## Supporting Information

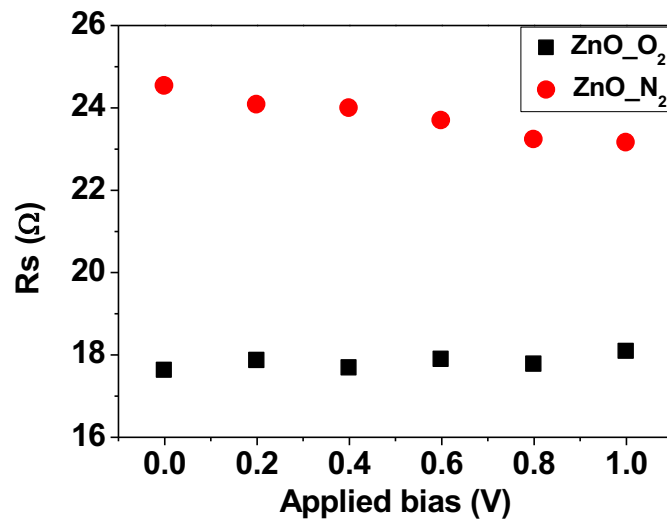

**Figure S14.** Fitted contact resistance,  $R_s$ , of impedance spectroscopy measurement of PSCs based on ZnO\_N<sub>2</sub> or ZnO\_O<sub>2</sub> substrates at 1 sun illumination

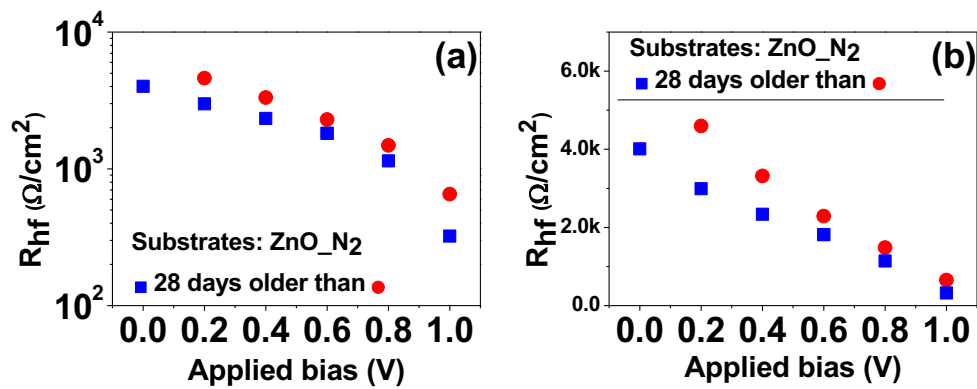

**Figure S15.**  $R_{hf}$  related to charge transport and to the recombination obtaining in the Figure 6, plotted in (a) log and (b) linear scale.
